# Supplementary material for: Circular RNA UVRAG Mediated by Alternative Splicing Factor NOVA1 Regulates Adhesion and Migration of Vascular Smooth Muscle Cells
Source: PubMed Central journal article supplement (PMC7999860; doi:10.3390/genes12030418), 2021-03-14
Supplement: genes-12-00418-s001.pdf [file genes-12-00418-s001.pdf]

## Supplementary Materials:

### Method of transcriptome sequencing

4 pairs of graft veins and control were obtained after one week of surgery. RNA from samples extracted by Trizol reagent (Invitrogen) with RIN>6.0 was utilized to construct rRNA depletion library (NEBNext Ultra Directional RNA Library Prep Kit) according to the manufacturer's instructions. Whole transcriptome sequencing data sequenced by HiSeq™ Sequencer was filtered (removing the adaptor sequences, reads with >5% ambiguous bases (noted as N) and low-quality reads containing more than 20 percent of bases with qualities of <20) and mapped to rat genome (Btgenome Version 5.0.1 NCBI) utilizing HISAT2 was used to calculate the gene count of mRNA and non-coding RNAs. NovelBrain Cloud Analysis Platform ([www.novelbrain.com](http://www.novelbrain.com), NovelBioinformatics Ltd., Co.) was used for the bioinformatics analysis. DE genes, including mRNA, miRNA, and circRNA, in the vein graft and control were analyzed utilizing DESeq with the following criteria: fold change > 2,  $p < 0.05$ , and false discovery rate (FDR) < 0.05.

Supplementary Fig. S1. Our sequencing results predicted abundant alternative mRNA splicing events in graft vein. Cassette: cassette exon, i.e. Skipped exon; Cassette\_multi: multiple adjacent Cassette exons; A5SS: Alternative 5' splice site; A3SS: Alternative 3' splice site; AltStart: Alternative start exon; AltEnd: Alternative end exon; MXE: Mutually exclusive exons; IR: intron retention

Supplementary Fig. S2. After knockdown of circUVRAG, the expression of NOVA1 mRNA did not change significantly, which indicated that NOVA1 was not regulated by circUVRAG(n=3).

Supplementary Fig. S3. Knockdown of circUVRAG had no significant effect on the VSMC proliferation detected with the BrdU assay (n=4). Colorimetric BrdU kit (Roche Diagnostics) was used to detect the proliferation of VSMCs. Enzyme linked immunosorbent assay plate reader (Bio-Rad 680) was used to measure the absorbance of culture medium with a wave length of 450 nm and 630 nm.

Supplementary Fig. S4. The sequence of circUVRAG in rat.

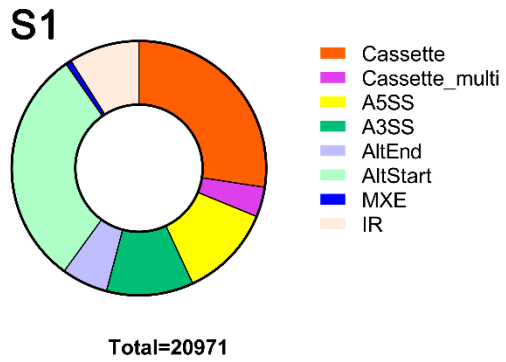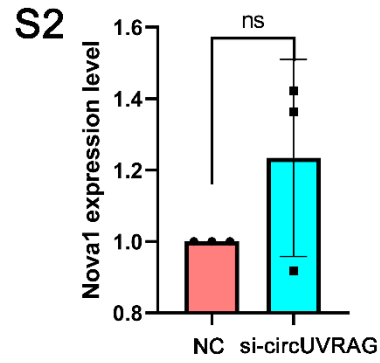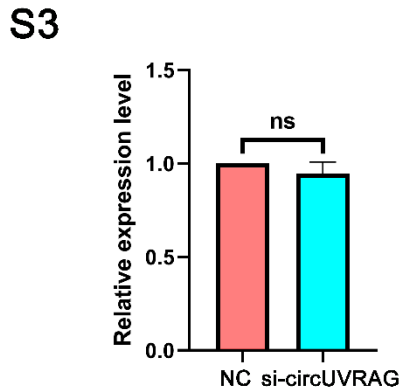

**S4**

```
>chr1_164064815_164025518_-39297-Uvrag
AATTTTATAGGAGTGAAGTGATTAAGAATTC
CTTGAATCCAACGTGGAGGAGTCTTGACT
TTGGAATAATGCCGGACCGTCTGGATACAT
CTGTGTCTGCTTTGTGGTGAAGATTTGGG
GTGGAAAGGAAGAGGCCTATCAGCTGTTGA
TAGAGTGGAAAGTCTACTTGGATGGGCTGA
AGTACTTGGGT CAGCAGATCCATGCCCGCA
ACCAGAAT GAAATCATT TTTGGGCTGAACG
ATGGCTACTACGGT GCTCCATTT GAACACA
AGGCTCATCCAAATGCACAGAAGAACCTCC
TTCAGGTGGACCAGAACTGTGTTCCGAATT
CCTATGATGTGTTTTCTTTGCTGCG
```

Supplementary Table S1. PCR primer sequence, siRNA sequence, and FISH probe sequence

| PCR primer sequence, siRNA sequence, and FISH probe sequence |         |                        |
|--------------------------------------------------------------|---------|------------------------|
| <b>Primer sequence</b>                                       |         |                        |
| circUVRAG                                                    | Forward | TGGACCAGAACTGTGTTTCGCA |
|                                                              | Reverse | GCCTCTTCCTTTCCACCCCA   |
| uvrag-mRNA                                                   | Forward | GGCTACTACGGTGCTCCATT   |
|                                                              | Reverse | CATTGCTTGTCGATGTGAGTCT |
| uvrag-premRNA                                                | Forward | GGCTGAACGATGGCTACTACG  |
|                                                              | Reverse | CCGACTTCTCAGAGTGCTTGTG |
| uvrag for gDNA                                               | Forward | GGAATAATGCCGGACCGTCT   |
|                                                              | Reverse | ACAGCTGATAGGCCTCTTCCT  |
| nova1                                                        | Forward | GCAGCACCAAGAGGACCAACAC |
|                                                              | Reverse | CTTGATCGTGGCTCCCGTTTCC |
| gapdh                                                        | Forward | TGAACTTGCCGTGGGTAGAG   |
|                                                              | Reverse | GATGGTGAAGGTCGGTGTGA   |
| <b>siRNA sequence</b>                                        |         |                        |
| Negative control                                             | Forward | UUCUUCGAACGUGUCACGUTT  |
|                                                              | Reverse | ACGUGACACGUUCGGAGAATT  |
| siRNA1 for circUVRAG                                         | Forward | UUCUUUGCUGCGAAUUUUUATT |
|                                                              | Reverse | UAAAAUUCGCAGCAAAGAATT  |
| siRNA2 for circUVRAG                                         | Forward | UUGCUGCGAAUUUUUAUAGGTT |
|                                                              | Reverse | CCUAUAAAAUUCGCAGCAATT  |

|                            |               |                           |
|----------------------------|---------------|---------------------------|
| siRNA1 for nova1           | Forward       | GCUGCUCAGUAAUUAAUUATT     |
|                            | Reverse       | UAAUUAUUACUGAGCAGCTT      |
| siRNA2 for nova1           | Forward       | GGUCCUCAUACCUAGUUUATT     |
|                            | Reverse       | AUAACUAGGUAUGAGGACCTT     |
| siRNA3 for nova1           | Forward       | GCUGCAACCAAUGGAUACUTT     |
|                            | Reverse       | AGUAUCCAUUGGUUGCAGCTT     |
| <b>Fish probe sequence</b> |               |                           |
| Negative control           | sense (5'-3') | TGCTTTGCACGGTAACGCCTGTTTT |
| circUVRAG probe mix        | sense (5'-3') | GGCCCCAAATCAGAGTCCAT      |
|                            | sense (5'-3') | CCGGGGAAGGAAGGGAAGAG      |
|                            | sense (5'-3') | CCCCAAATCAGAGTCCATGG      |

Supplementary Table S2. The homologous circUVRAG in humans and mice

| Position<br>(genome<br>browser link) | Strand | circRNA ID       | Genomic<br>length | Spliced<br>length | Best<br>transcript     |
|--------------------------------------|--------|------------------|-------------------|-------------------|------------------------|
| chr7:10624782<br>1-106266815         | -      | mmu_circ_0013695 | 18994             | 315               | ENSMUST000<br>00037968 |
| chr7:10621430<br>9-106247983         | -      | mmu_circ_0001601 | 33674             | 320               | NM_178635              |
| chr11:7557279<br>0-75672593          | +      | hsa_circ_0023635 | 99803             | 464               | NM_003369              |
| chr11:7557279<br>0-75623083          | +      | hsa_circ_0023634 | 50293             | 358               | NM_003369              |
| chr11:7556292<br>7-75694557          | +      | hsa_circ_0023633 | 131630            | 709               | NM_003369              |
| chr11:7556292<br>7-75623083          | +      | hsa_circ_0096459 | 60156             | 476               | NM_003369              |
| chr11:7556292<br>7-75599947          | +      | hsa_circ_0140972 | 37020             | 390               | NM_003369              |
| chr11:7556292<br>7-75599947          | +      | hsa_circ_0096458 | 37020             | 390               | NM_003369              |

**Supplementary Table S3.** The top 10 RNA Binding Proteins predicted by catrapid.

| <b>Protein</b>              | <b>Transcript</b>     | <b>Z-score</b> | <b>Discriminative Power</b> | <b>Interaction Strength</b> | <b>Motif</b> |
|-----------------------------|-----------------------|----------------|-----------------------------|-----------------------------|--------------|
| sp P63155 C<br>RNL1_RAT     | chr1_164064815_<br>_1 | 0.91           | 0.96                        | 0.88                        | NO           |
| sp Q496Z9 T<br>RM1L_RAT     | chr1_164064815_<br>_1 | 0.81           | 0.96                        | 0.8                         | NO           |
| sp Q99PF5 F<br>UBP2_RAT     | chr1_164064815_<br>_1 | 0.78           | 0.95                        | 0.79                        | NO           |
| sp Q641Y8 D<br>DX1_RAT      | chr1_164064815_<br>_1 | 0.71           | 0.95                        | 0.85                        | NO           |
| sp Q7TP47 <br>HNRPQ_RA<br>T | chr1_164064815_<br>_1 | 0.64           | 0.93                        | 0.87                        | NO           |
| sp P51400 R<br>ED1_RAT      | chr1_164064815_<br>_1 | 0.62           | 0.92                        | 0.73                        | NO           |
| sp B2RYD2 <br>ESRP1_RAT     | chr1_164064815_<br>_1 | 0.57           | 0.91                        | 0.85                        | NO           |
| sp P13383 N<br>UCL_RAT      | chr1_164064815_<br>_1 | 0.51           | 0.9                         | 0.68                        | NO           |
| sp Q5XI28 R<br>AVR1_RAT     | chr1_164064815_<br>_1 | 0.48           | 0.89                        | 0.78                        | NO           |
| sp P68101 IIF<br>2A_RAT     | chr1_164064815_<br>_1 | 0.45           | 0.88                        | 0.97                        | NO           |
